# Supplementary material
Source: HighWire-hosted journal article supplement (https://drc.bmj.com/content/7/1/e000857)

**Supplementary File:****Title: Association of Regional Deprivation and Type 2 Diabetes Incidence in Germany**

E Jacobs, T Tönnies, W Rathmann, R Brinks, A Hoyer

Fig. 1: Sex-specific incidence rate ratios of type 2 diabetes (95% confidence intervals) by regional deprivation (quintile 2-5 compared to the least deprived quintile 1) in Germany in 2012 (a: age 20-44 years, b: 45-64 years, c: 65-74 years, d: >75 years)

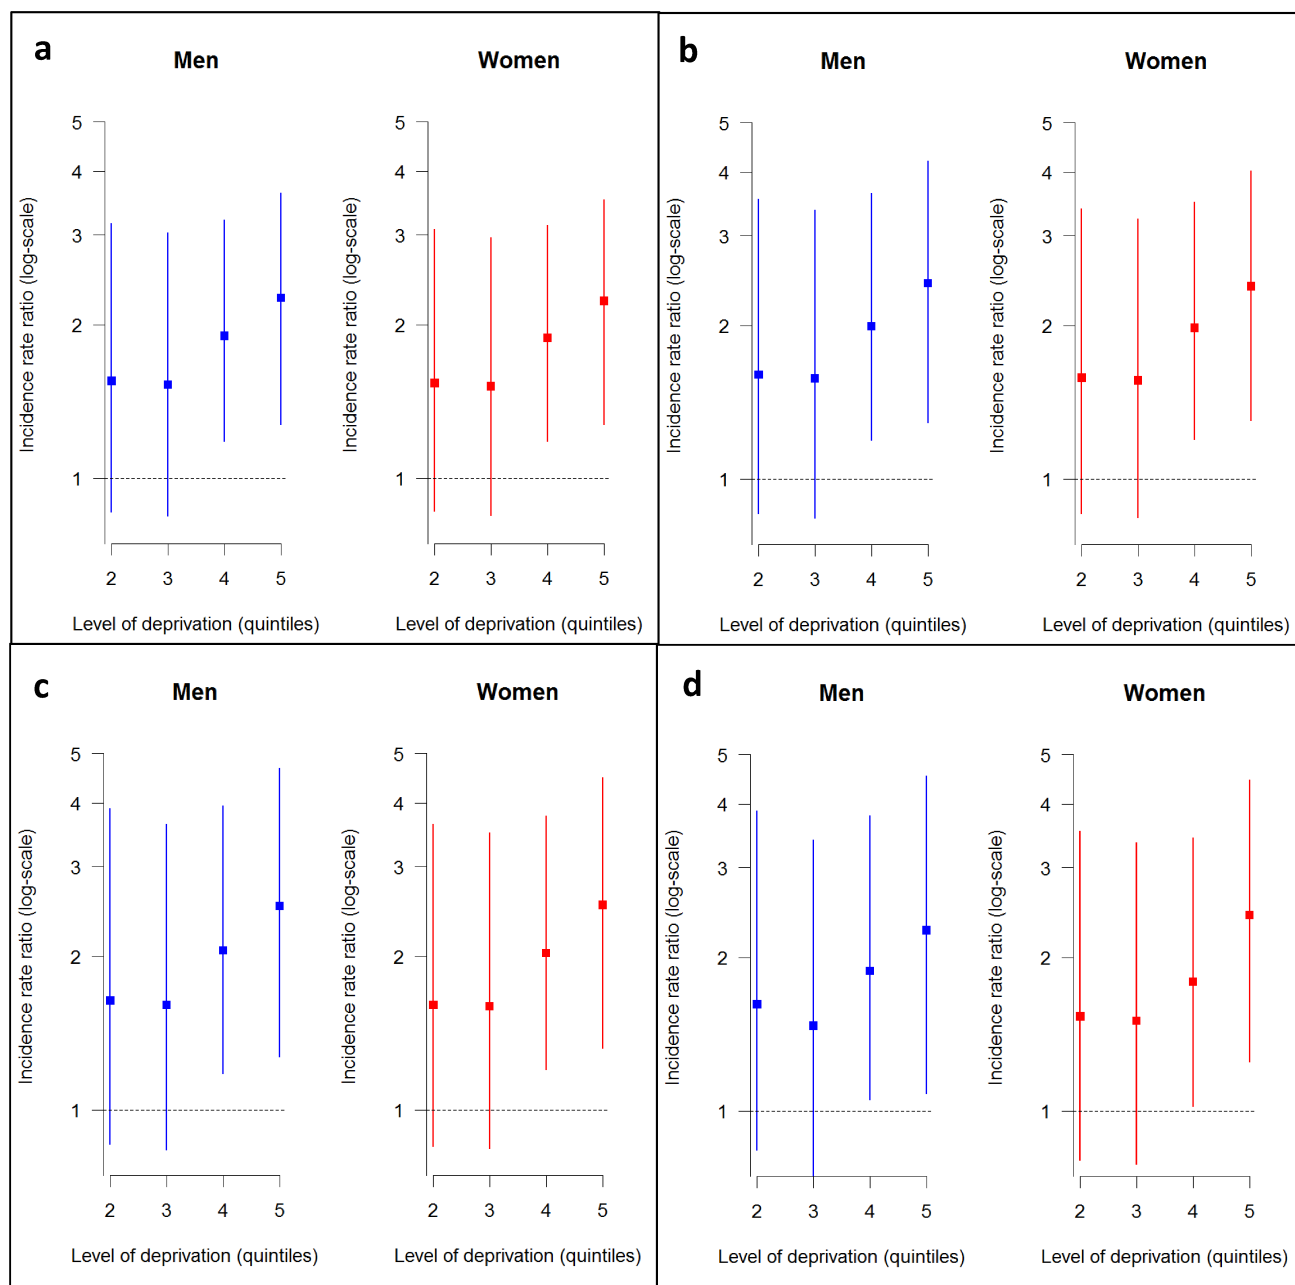

Supplement: inline-supplementary-material-1 [file inline-supplementary-material-1.pdf]
